# Supplementary material for: Responsible Research and Innovation Framework, the Nagoya Protocol and Other European Blue Biotechnology Strategies and Regulations: Gaps Analysis and Recommendations for Increased Knowledge in the Marine Biotechnology Community
Source: MDPI journal article supplement (doi:10.3390/md20050290), 2022-04-26
Supplement: s1 [file s1]

## Supplementary Materials

# Why Every Marine Biotechnology Scientist Must consider the Responsible Research and Innovation, the Nagoya protocol and other European Blue Biotechnology strategies and regulations

Xenia Theodotou Schneider <sup>1,\*</sup>, Belma Kalamujić Stroil <sup>2</sup>, Christiana Tourapi <sup>3</sup>, Céline Rebours <sup>4</sup>,  
Susana P. Gaudêncio <sup>5,6</sup>, Lucie Novoveska <sup>7</sup> and Marlen I. Vasquez <sup>3,8</sup>

<sup>1</sup> XPRO Consulting Limited, Strovolos 2021, Cyprus

<sup>2</sup> Institute for Genetic Engineering and Biotechnology, University of Sarajevo, 71000 Sarajevo, Bosnia and Herzegovina; belma.kalamujic@ingeb.unsa.ba

<sup>3</sup> Department of Chemical Engineering, Cyprus University of Technology, Limassol 3036, Cyprus; ctourapi@yahoo.com (C.T.); marlen.vasquez@cut.ac.cy (M.I.V.)

<sup>4</sup> Møreforsking AS, 6021 Ålesund, Norway; celine.rebours@moreforsking.no

<sup>5</sup> Associate Laboratory i4HB, Institute for Health and Bioeconomy, NOVA School of Science and Technology, NOVA University Lisbon, 2819-516 Caparica, Portugal; s.gaudencio@fct.unl.pt

<sup>6</sup> UCIBIO—Applied Molecular Biosciences Unit, NOVA School of Science and Technology, NOVA University of Lisbon, 2819-516 Caparica, Portugal

<sup>7</sup> Ocean4Biotech, Edinburgh EH12 5AD, UK; lucie.novoveska@gmail.com

<sup>8</sup> European University of Technology, Limassol 3036, Cyprus

\* Correspondence: xenia-schneider@xpro-consulting.com; Tel.: +33-6-69776917

**Table S1.** An overview of the regulatory guidelines to be considered during the BB value chain, from organism identification to natural product uptake.

| Marine Biotechnology Value Chain Steps                                                                                                                                                                                                                                                                          | European Union Directives, Policies and Guidelines                                                                                                                                                                                                                                                                                                                                                                                                                                                                                                                                                                                                                                                                                                                                                                                                                                                                                                                                                                                                                                                                                                                                                                                                                                                                                                                                                                  | International Conventions, Protocols, Guidelines and Standards                                                                                                                                                                                                                                                                                                                                                                                                                                                                                                                                                                                                                                                                                                                                                                                                                                                                                                                                                                                                                                                                                                                                                                                                                                                        |
|-----------------------------------------------------------------------------------------------------------------------------------------------------------------------------------------------------------------------------------------------------------------------------------------------------------------|---------------------------------------------------------------------------------------------------------------------------------------------------------------------------------------------------------------------------------------------------------------------------------------------------------------------------------------------------------------------------------------------------------------------------------------------------------------------------------------------------------------------------------------------------------------------------------------------------------------------------------------------------------------------------------------------------------------------------------------------------------------------------------------------------------------------------------------------------------------------------------------------------------------------------------------------------------------------------------------------------------------------------------------------------------------------------------------------------------------------------------------------------------------------------------------------------------------------------------------------------------------------------------------------------------------------------------------------------------------------------------------------------------------------|-----------------------------------------------------------------------------------------------------------------------------------------------------------------------------------------------------------------------------------------------------------------------------------------------------------------------------------------------------------------------------------------------------------------------------------------------------------------------------------------------------------------------------------------------------------------------------------------------------------------------------------------------------------------------------------------------------------------------------------------------------------------------------------------------------------------------------------------------------------------------------------------------------------------------------------------------------------------------------------------------------------------------------------------------------------------------------------------------------------------------------------------------------------------------------------------------------------------------------------------------------------------------------------------------------------------------|
| <b>1. Organisms / Microorganisms Sourcing</b> <ul style="list-style-type: none"> <li><i>Ex situ</i> <ul style="list-style-type: none"> <li>Biological Resource Centres</li> </ul> </li> <li><i>In situ</i> <ul style="list-style-type: none"> <li>Harvesting from the marine environment</li> </ul> </li> </ul> | <p>EC Regulations in force:</p> <ul style="list-style-type: none"> <li><a href="#">Regulation (EC) No 1946/2003 of the European Parliament and of the Council of 15 July 2003</a> on transboundary movements of genetically modified organisms</li> <li><a href="#">Marine Strategy Framework Directive</a></li> <li><a href="#">Marine Protected Areas</a></li> <li><a href="#">Regulation (EU) 2015/1866 of 13 October 2015 laying down detailed rules for the implementation of Regulation (EU) No 511/2014 of the European Parliament and of the Council as regards the register of collections, monitoring user compliance and best practices</a></li> <li><a href="#">Sea-Basin Strategies (including the outermost regions in the Atlantic Ocean (including Macaronesia and Caribbean-Amazonia) and of its corresponding action plan 73)</a></li> <li><a href="#">European Aquaculture Technology Platform for the improved management of the biological lifecycle</a></li> <li><a href="#">Council Directive 98/58/EC of 20 July 1998 Concerning the Protection of Animals Kept for Farming Purposes. Off. J. L 1998, 221, 23–27</a> (<a href="https://eur-lex.europa.eu/eli/dir/1998/58/2019-12-14">https://eur-lex.europa.eu/eli/dir/1998/58/2019-12-14</a>).</li> <li><a href="#">Council Regulation (EC) No 1/2005 of 22 December 2004 on the Protection of Animals during Transport and</a></li> </ul> | <ul style="list-style-type: none"> <li><a href="#">Convention on Biological Diversity</a></li> <li><a href="#">Nagoya Protocol</a></li> <li><a href="#">Cartagena Protocol on Biosafety</a></li> <li>Bonn Guidelines (<a href="#">Bonn Guidelines on access to genetic resources and fair and equitable sharing of the benefits arising out of their utilization (cbd.int)</a>)</li> <li>Internationally recognized certificate of compliance: Prior Informed Consent (PIC), contact National Focal Points (NFPs) (<a href="https://absch.cbd.int/countries">https://absch.cbd.int/countries</a>) and have documented permission from Competent National Authorities (CNAs)</li> <li>Mutually Agreed Terms (MAT), including benefit-sharing arrangements, between provider and user (which depends on the institutional guidelines).</li> <li>Material transfer agreement (for bioresource exchanging), which depends on the institutional guidelines.</li> <li>Antarctic treaty (<a href="#">att005_e.pdf</a> ; <a href="#">The Antarctic Treaty   Antarctic Treaty (ats.aq)</a>)</li> <li>Svalbard treaty (<a href="#">International Agreements - Arctic Portal</a>)</li> <li><a href="#">Agreement on the Conservation of Cetaceans in the Black Sea Mediterranean Sea and Contiguous Atlantic Area</a></li> </ul> |

|                                                                                                                                                                                                                                                                                                                                                                                                                                                                                                                                                     |                                                                                                                                                                                                                                                                                                                                                                                                                                                                                                                                                                                                                                                                                                                                                                                                                                                                                                                                                                                                                                  |                                                                                                                                                                                                                                                                                                                                                                                                                                                                                                                                                                                                                                                                                                                                                                                                                       |
|-----------------------------------------------------------------------------------------------------------------------------------------------------------------------------------------------------------------------------------------------------------------------------------------------------------------------------------------------------------------------------------------------------------------------------------------------------------------------------------------------------------------------------------------------------|----------------------------------------------------------------------------------------------------------------------------------------------------------------------------------------------------------------------------------------------------------------------------------------------------------------------------------------------------------------------------------------------------------------------------------------------------------------------------------------------------------------------------------------------------------------------------------------------------------------------------------------------------------------------------------------------------------------------------------------------------------------------------------------------------------------------------------------------------------------------------------------------------------------------------------------------------------------------------------------------------------------------------------|-----------------------------------------------------------------------------------------------------------------------------------------------------------------------------------------------------------------------------------------------------------------------------------------------------------------------------------------------------------------------------------------------------------------------------------------------------------------------------------------------------------------------------------------------------------------------------------------------------------------------------------------------------------------------------------------------------------------------------------------------------------------------------------------------------------------------|
|                                                                                                                                                                                                                                                                                                                                                                                                                                                                                                                                                     | <p><a href="#">Related Operations and Amending Directives 64/432/EEC and 93/119/EC and Regulation (EC) No 1255/97. Off. J. Eur. Union 2005, 1, 1–44 (<a href="https://eur-lex.europa.eu/eli/reg/2005/1/2019-12-14">https://eur-lex.europa.eu/eli/reg/2005/1/2019-12-14</a>)<a href="https://eur-lex.europa.eu/eli/reg/2005/1/2019-12-14">https://eur-lex.europa.eu/eli/reg/2005/1/2019-12-14</a>.</a></p> <ul style="list-style-type: none"> <li>• <a href="#">Council Regulation (EC) No 1099/2009 of 24 September 2009 on the Protection of Animals at the Time of Killing (Text with EEA Relevance). Off. J. Eur. Union 2009, 303, 1–30 (<a href="https://eur-lex.europa.eu/legal-content/EN/ALL/?uri=CELEX%3A32009R1099">https://eur-lex.europa.eu/legal-content/EN/ALL/?uri=CELEX%3A32009R1099</a>).</a></li> <li>• <a href="#">The Ecosystem Approach to the management of human activities that may affect the Mediterranean marine and coastal environment (in the framework of the Barcelona Convention)</a></li> </ul> |                                                                                                                                                                                                                                                                                                                                                                                                                                                                                                                                                                                                                                                                                                                                                                                                                       |
| <p><b>2. Cultivation and Biomass Production</b></p> <ul style="list-style-type: none"> <li>• Use of Best Practices Protocols</li> <li>• Biomass generated (production data, export, import)</li> <li>• Libraries / Biobanks <ul style="list-style-type: none"> <li>• Specimens/Strains cataloguing</li> <li>• Specimens/Strains preservation</li> </ul> </li> <li>• Specimen/Strain selection</li> <li>• DNA for identification</li> <li>• Selection of broodstock of Bioactive microorganisms (Genome Sequencing, gene expression etc.)</li> </ul> | <ul style="list-style-type: none"> <li>• <a href="#">2000/608/EC: Commission Decision of 27 September 2000 concerning the guidance notes for risk assessment outlined in Annex III of Directive 90/219/EEC on the contained use of genetically modified micro-organisms (notified under document number C(2000) 2736</a></li> <li>• <a href="#">Directive 2009/41/EC of the European Parliament and of the Council of 6 May 2009 on the contained use of genetically modified micro-organisms (Recast)</a></li> <li>• <a href="#">Universal Declaration of Human Rights   United Nations</a> and its international Human right laws.</li> <li>• GLP (<a href="#">Good Laboratory Practice (europa.eu)</a>) which include two EU directives : <a href="#">EUR-Lex - 32004L0009 - EN -</a></li> </ul>                                                                                                                                                                                                                              | <ul style="list-style-type: none"> <li>• <a href="#">Nagoya Protocol</a></li> <li>• Internationally recognized certificate of compliance: <ul style="list-style-type: none"> <li>• <a href="#">Prior Informed Consent (PIC), contact National Focal Points (NFPs) and have documented permission from Competent National Authorities (CNAs)</a></li> </ul> </li> <li>• Mutually Agreed Terms (MAT), including benefit-sharing arrangements, between provider and user.</li> <li>• Material transfer agreement (for bioresource exchanging), between provider and user.</li> <li>• Mandatory Deposit DNA sequences: <a href="#">International Nucleotide Sequence Database Collaboration</a>, which comprises the DNA DataBank of Japan (DDBJ), the European Nucleotide Archive (ENA), and GenBank at NCBI.</li> </ul> |

|                                                                                                                                                                                                                                                                                                                                                                                                                                                                                                                                                                |                                                                                                                                                                                                                                                                                                                                                                                                                                                                                                                                                            |                                                                                                                                                                                                                                                                                                                                                                                                                                                                                                                                                                                                                                                                                                                                                                                                                                                                                                                                                                            |
|----------------------------------------------------------------------------------------------------------------------------------------------------------------------------------------------------------------------------------------------------------------------------------------------------------------------------------------------------------------------------------------------------------------------------------------------------------------------------------------------------------------------------------------------------------------|------------------------------------------------------------------------------------------------------------------------------------------------------------------------------------------------------------------------------------------------------------------------------------------------------------------------------------------------------------------------------------------------------------------------------------------------------------------------------------------------------------------------------------------------------------|----------------------------------------------------------------------------------------------------------------------------------------------------------------------------------------------------------------------------------------------------------------------------------------------------------------------------------------------------------------------------------------------------------------------------------------------------------------------------------------------------------------------------------------------------------------------------------------------------------------------------------------------------------------------------------------------------------------------------------------------------------------------------------------------------------------------------------------------------------------------------------------------------------------------------------------------------------------------------|
| <ul style="list-style-type: none"> <li>Limited standing biomass per site and/or limited sea or land area for such production</li> <li>Lost/waste during production</li> <li>Processing of the product</li> <li>Documentation of the product quality and if used as food or feed ingredient, feed and food safety should apply</li> <li>Environmental impact of production</li> <li>Import of the material for this production</li> <li>Work conditions and worker security</li> <li>Biohazards (chemicals used for cleaning or to control diseases)</li> </ul> | <ul style="list-style-type: none"> <li><a href="#">EUR-Lex (europa.eu)</a> and <a href="#">EUR-Lex - 32004L0010 - EN - EUR-Lex (europa.eu)</a></li> <li><a href="#">EU regulation on personal protective equipment 32016R0425 - EN - EUR-Lex</a></li> </ul>                                                                                                                                                                                                                                                                                                | <ul style="list-style-type: none"> <li><a href="#">Mandatory Deposit genome sequences</a>: Integrated Microbial Genomes &amp; Microbiomes (<a href="https://img.jgi.doe.gov/">https://img.jgi.doe.gov/</a>)</li> <li>ISO Laboratory Standards</li> <li>ISO Biotechnology — Ancillary materials present during the production of cellular therapeutic products: <ul style="list-style-type: none"> <li><a href="#">ISO/TS 20399-1:2018</a></li> <li><a href="#">ISO/TS 20399-2:2018</a></li> <li><a href="#">ISO/TS 20399-3:2018</a> ISO/CD 20399 Biotechnology — Ancillary materials present during the production of cellular therapeutic products and gene therapy products (will replace the ISO/TS 20399-3:2018)</li> </ul> </li> <li>Conformity assessment procedures for protective equipment</li> <li>WHO Pandemic Influenza Preparedness Framework</li> <li><a href="#">Biosafety in Microbiological and Biomedical Laboratories (BMBL) 6th Edition</a></li> </ul> |
| <p><b>3. Discovery of organism / microorganism potential</b></p> <ul style="list-style-type: none"> <li>Bioactivity screening</li> <li>Specimen/ Strain selection</li> <li>Right of ownership</li> <li>Use of Best Practices Protocols</li> </ul>                                                                                                                                                                                                                                                                                                              | <ul style="list-style-type: none"> <li><a href="#">Directive 2009/41/EC of the European Parliament and of the Council of 6 May 2009 on the contained use of genetically modified microorganisms (Recast)</a></li> <li><a href="#">IP Protection for genetically modified organisms / microorganisms, use of organisms / microorganisms for an innovative utility; process using organisms / microorganisms, screening / diagnostic assays</a></li> <li><a href="#">European standards   Internal Market, Industry, Entrepreneurship and SEs</a></li> </ul> | <p>ISO Laboratory Standards</p> <ul style="list-style-type: none"> <li>Internationally recognized certificate of compliance:</li> <li><a href="#">Prior Informed Consent (PIC), contact National Focal Points (NFPs) and have documented permission from Competent National Authorities (CNAs)</a></li> <li>Mutually Agreed Terms (MAT), including benefit-sharing arrangements, between provider and user.</li> <li>Material transfer agreement (for bioresource exchanging)</li> </ul>                                                                                                                                                                                                                                                                                                                                                                                                                                                                                   |

|                                                                                                                                                                                                                                                                                                                                                                                                                                                                                                                                                                                                  |                                                                                                                                                                                                                                                                                                                                                                                                                                                                                                                                                                                |                                                                                                                                                                                                                                                                                  |
|--------------------------------------------------------------------------------------------------------------------------------------------------------------------------------------------------------------------------------------------------------------------------------------------------------------------------------------------------------------------------------------------------------------------------------------------------------------------------------------------------------------------------------------------------------------------------------------------------|--------------------------------------------------------------------------------------------------------------------------------------------------------------------------------------------------------------------------------------------------------------------------------------------------------------------------------------------------------------------------------------------------------------------------------------------------------------------------------------------------------------------------------------------------------------------------------|----------------------------------------------------------------------------------------------------------------------------------------------------------------------------------------------------------------------------------------------------------------------------------|
| <p><b>4. Natural Product Discovery and IP Protection</b></p> <ul style="list-style-type: none"> <li>• Dereplication / Prioritisation of Extracts</li> <li>• Extraction and Isolation of Natural Products</li> <li>• Natural Product Structure Elucidation and Determination of Absolute l Configuration</li> <li>• Pure Natural Product Bioactivity Screening</li> <li>• Use of Best Practices Protocols</li> <li>• Sustainable Natural Products scale-up production (synthesis and/or fermentation)</li> <li>• Legal clarity for use</li> <li>• Proof of compliance with regulations</li> </ul> | <ul style="list-style-type: none"> <li>• <a href="https://european-council.europa.eu/media/e300042f-823d-4f40-b03d-6246b0638600?disposition=inline">Chemicals legislation (europa.eu)</a></li> <li>• <a href="#">Directive 98/44/EC on the legal protection of biotechnological inventions</a></li> <li>• IP protection for innovative use of Natural Products<sup>i</sup></li> <li>• <a href="#">European Patent Agency and National Intellectual Property Agencies</a></li> <li>• <a href="#">Sustainable Blue Economy Finance Principles</a> (EC, EIB, WWF, ERI)</li> </ul> | <p>ISO Laboratory Standards</p> <p><a href="#">Sustainable Blue Economy Finance Principles (UNEP FI)</a></p> <p><a href="#">UN Environment's Principles for Sustainable Insurance Initiative (PSI) and the World Bank</a></p> <p><a href="#">Material transfer agreement</a></p> |
| <p><b>5. Uptake for Research and Development in one of the following sectors:</b></p> <ul style="list-style-type: none"> <li>• Pharmaceutical</li> <li>• Nutraceutical</li> <li>• Cosmetics</li> <li>• Food</li> <li>• Chemical Industry</li> <li>• Energy</li> <li>• Environment</li> <li>• Textile</li> <li>• Naval</li> </ul>                                                                                                                                                                                                                                                                 | <ul style="list-style-type: none"> <li>• Regulations based on each sector</li> </ul>                                                                                                                                                                                                                                                                                                                                                                                                                                                                                           | <ul style="list-style-type: none"> <li>• Regulations based on each sector</li> </ul>                                                                                                                                                                                             |

**Table S2.** An overview of the information on the appointed NFPs, online available ABS procedures and application forms, and national websites or databases with information regarding the implementation on a national level for EU members and associated countries. Abbreviations: NA – Not applicable.

| No. | Country        | NCP URL                                                                                                 | Website with ABS Procedure                                                                                                                                                                                                                                                                                                                                                                          | Website with the Forms                                                                                                                                                                                                                                                                                                                                                                                                            | Application Fees Exist | National Websites or Database                                                                                                                                                                                                                                                                                                                                                                                                                                                                                                                                                                                                                                                                                                                                                                                                                                                                   |
|-----|----------------|---------------------------------------------------------------------------------------------------------|-----------------------------------------------------------------------------------------------------------------------------------------------------------------------------------------------------------------------------------------------------------------------------------------------------------------------------------------------------------------------------------------------------|-----------------------------------------------------------------------------------------------------------------------------------------------------------------------------------------------------------------------------------------------------------------------------------------------------------------------------------------------------------------------------------------------------------------------------------|------------------------|-------------------------------------------------------------------------------------------------------------------------------------------------------------------------------------------------------------------------------------------------------------------------------------------------------------------------------------------------------------------------------------------------------------------------------------------------------------------------------------------------------------------------------------------------------------------------------------------------------------------------------------------------------------------------------------------------------------------------------------------------------------------------------------------------------------------------------------------------------------------------------------------------|
| 1.  | Austria        | <a href="https://www.cbd.int/kb/record/focalPoint/264">https://www.cbd.int/kb/record/focalPoint/264</a> | NA                                                                                                                                                                                                                                                                                                                                                                                                  | NA                                                                                                                                                                                                                                                                                                                                                                                                                                | NA                     | <a href="http://www.biodiv-abs.at/">http://www.biodiv-abs.at/</a> ;<br><a href="http://www.biologischevielfalt.at">http://www.biologischevielfalt.at</a>                                                                                                                                                                                                                                                                                                                                                                                                                                                                                                                                                                                                                                                                                                                                        |
| 2.  | Belgium        | <a href="http://www.cbd.int/kb/record/focalPoint/6528">http://www.cbd.int/kb/record/focalPoint/6528</a> | NA                                                                                                                                                                                                                                                                                                                                                                                                  | NA                                                                                                                                                                                                                                                                                                                                                                                                                                | NA                     | <a href="http://nagoya.vlir.be/en/home-tool/">http://nagoya.vlir.be/en/home-tool/</a> ;<br><a href="https://www.wallonie.be/fr/demarches/sinformer-sur-le-protocole-de-nagoya-et-ses-obligations">https://www.wallonie.be/fr/demarches/sinformer-sur-le-protocole-de-nagoya-et-ses-obligations</a> ;<br><a href="http://www.biodiv.be/convention/nagoya-protocol-access-and-benefit-sharing">http://www.biodiv.be/convention/nagoya-protocol-access-and-benefit-sharing</a>                                                                                                                                                                                                                                                                                                                                                                                                                     |
| 3.  | Bulgaria       | <a href="http://www.cbd.int/kb/record/focalPoint/7394">http://www.cbd.int/kb/record/focalPoint/7394</a> | NA                                                                                                                                                                                                                                                                                                                                                                                                  | NA                                                                                                                                                                                                                                                                                                                                                                                                                                | NA                     | NA                                                                                                                                                                                                                                                                                                                                                                                                                                                                                                                                                                                                                                                                                                                                                                                                                                                                                              |
| 4.  | Croatia        | <a href="http://www.cbd.int/kb/record/focalPoint/7642">http://www.cbd.int/kb/record/focalPoint/7642</a> | NA                                                                                                                                                                                                                                                                                                                                                                                                  | NA                                                                                                                                                                                                                                                                                                                                                                                                                                | NA                     | NA                                                                                                                                                                                                                                                                                                                                                                                                                                                                                                                                                                                                                                                                                                                                                                                                                                                                                              |
| 5.  | Cyprus         | <a href="http://www.cbd.int/kb/record/focalPoint/5934">http://www.cbd.int/kb/record/focalPoint/5934</a> | NA                                                                                                                                                                                                                                                                                                                                                                                                  | NA                                                                                                                                                                                                                                                                                                                                                                                                                                | NA                     | NA                                                                                                                                                                                                                                                                                                                                                                                                                                                                                                                                                                                                                                                                                                                                                                                                                                                                                              |
| 6.  | Czech Republic | <a href="http://www.cbd.int/kb/record/focalPoint/6895">http://www.cbd.int/kb/record/focalPoint/6895</a> | NA                                                                                                                                                                                                                                                                                                                                                                                                  | NA                                                                                                                                                                                                                                                                                                                                                                                                                                | NA                     | <a href="https://www.mzp.cz/cz/nagojsky_protokol">https://www.mzp.cz/cz/nagojsky_protokol</a>                                                                                                                                                                                                                                                                                                                                                                                                                                                                                                                                                                                                                                                                                                                                                                                                   |
| 7.  | Denmark        | <a href="http://www.cbd.int/kb/record/focalPoint/2410">http://www.cbd.int/kb/record/focalPoint/2410</a> | NA                                                                                                                                                                                                                                                                                                                                                                                                  | NA                                                                                                                                                                                                                                                                                                                                                                                                                                | NA                     | <a href="https://eng.mst.dk/nature-water/nature/biodiversity-the-building-block-of-life/the-nagoya-protocol-on-access-and-benefit-sharing/">https://eng.mst.dk/nature-water/nature/biodiversity-the-building-block-of-life/the-nagoya-protocol-on-access-and-benefit-sharing/</a> ; <a href="https://mst.dk/naturvand/natur/biodiversitet/hvordan-bevarer-vi-biodiversiteten/globalt-2020-maal/abs-protokol/">https://mst.dk/naturvand/natur/biodiversitet/hvordan-bevarer-vi-biodiversiteten/globalt-2020-maal/abs-protokol/</a>                                                                                                                                                                                                                                                                                                                                                               |
| 8.  | Estonia        | <a href="http://www.cbd.int/kb/record/focalPoint/7257">http://www.cbd.int/kb/record/focalPoint/7257</a> | NA                                                                                                                                                                                                                                                                                                                                                                                                  | NA                                                                                                                                                                                                                                                                                                                                                                                                                                | NA                     | NA                                                                                                                                                                                                                                                                                                                                                                                                                                                                                                                                                                                                                                                                                                                                                                                                                                                                                              |
| 9.  | Finland        | <a href="http://www.cbd.int/kb/record/focalPoint/6090">http://www.cbd.int/kb/record/focalPoint/6090</a> | NA                                                                                                                                                                                                                                                                                                                                                                                                  | NA                                                                                                                                                                                                                                                                                                                                                                                                                                | NA                     | <a href="http://www.biodiversity.fi/geneticresources/home">http://www.biodiversity.fi/geneticresources/home</a>                                                                                                                                                                                                                                                                                                                                                                                                                                                                                                                                                                                                                                                                                                                                                                                 |
| 10. | France         | <a href="http://www.cbd.int/kb/record/focalPoint/5585">http://www.cbd.int/kb/record/focalPoint/5585</a> | <a href="https://absch.cbd.int/data-base/PRO/ABSCH-PRO-FR-249352">https://absch.cbd.int/data-base/PRO/ABSCH-PRO-FR-249352</a> ;<br><a href="https://absch.cbd.int/data-base/PRO/ABSCH-PRO-FR-249353">https://absch.cbd.int/data-base/PRO/ABSCH-PRO-FR-249353</a> ;<br><a href="https://absch.cbd.int/data-base/PRO/ABSCH-PRO-FR-249354">https://absch.cbd.int/data-base/PRO/ABSCH-PRO-FR-249354</a> | <a href="https://www.formulaires.service-public.fr/gf/cerfa_15784.d_o">https://www.formulaires.service-public.fr/gf/cerfa_15784.d_o</a> ;<br><a href="https://www.formulaires.service-public.fr/gf/cerfa_15785.d_o">https://www.formulaires.service-public.fr/gf/cerfa_15785.d_o</a> ;<br><a href="https://www.formulaires.service-public.fr/gf/cerfa_15786.d_o">https://www.formulaires.service-public.fr/gf/cerfa_15786.d_o</a> | No                     | <ul style="list-style-type: none"><li>• <a href="https://webgate.ec.europa.eu/declare/web/domain">https://webgate.ec.europa.eu/declare/web/domain</a>;</li><li>• <a href="http://www.enseignementsup-recherche.gouv.fr/cid127438/les-plates-formes-d-enregistrement-pour-l-utilisation-de-ressources-genetiques-et-de-connaissances-traditionnelles-associees.html">http://www.enseignementsup-recherche.gouv.fr/cid127438/les-plates-formes-d-enregistrement-pour-l-utilisation-de-ressources-genetiques-et-de-connaissances-traditionnelles-associees.html</a>;</li><li>• <a href="https://www.ecologique-solidaire.gouv.fr/acces-et-partage-des-avantages-decoulant-lutilisation-des-ressources-genetiques-et-des-connaissances">https://www.ecologique-solidaire.gouv.fr/acces-et-partage-des-avantages-decoulant-lutilisation-des-ressources-genetiques-et-des-connaissances</a></li></ul> |
| 11. | Germany        | <a href="http://www.cbd.int/kb/record/focalPoint/7089">http://www.cbd.int/kb/record/focalPoint/7089</a> | NA                                                                                                                                                                                                                                                                                                                                                                                                  | NA                                                                                                                                                                                                                                                                                                                                                                                                                                | NA                     | <a href="http://abs.bfn.de">http://abs.bfn.de</a>                                                                                                                                                                                                                                                                                                                                                                                                                                                                                                                                                                                                                                                                                                                                                                                                                                               |
| 12. | Greece         | <a href="http://www.cbd.int/kb/record/focalPoint/7486">http://www.cbd.int/kb/record/focalPoint/7486</a> | NA                                                                                                                                                                                                                                                                                                                                                                                                  | NA                                                                                                                                                                                                                                                                                                                                                                                                                                | NA                     | NA                                                                                                                                                                                                                                                                                                                                                                                                                                                                                                                                                                                                                                                                                                                                                                                                                                                                                              |
| 13. | Hungary        | <a href="http://www.cbd.int/kb/record/focalPoint/2662">http://www.cbd.int/kb/record/focalPoint/2662</a> | NA                                                                                                                                                                                                                                                                                                                                                                                                  | NA                                                                                                                                                                                                                                                                                                                                                                                                                                | NA                     | <a href="http://www.biodiv.hu">http://www.biodiv.hu</a>                                                                                                                                                                                                                                                                                                                                                                                                                                                                                                                                                                                                                                                                                                                                                                                                                                         |
| 14. | Ireland        | <a href="http://www.cbd.int/kb/record/focalPoint/6384">http://www.cbd.int/kb/record/focalPoint/6384</a> | NA                                                                                                                                                                                                                                                                                                                                                                                                  | NA                                                                                                                                                                                                                                                                                                                                                                                                                                | NA                     | NA                                                                                                                                                                                                                                                                                                                                                                                                                                                                                                                                                                                                                                                                                                                                                                                                                                                                                              |
| 15. | Italy          | <a href="http://www.cbd.int/kb/record/focalPoint/7549">http://www.cbd.int/kb/record/focalPoint/7549</a> | NA                                                                                                                                                                                                                                                                                                                                                                                                  | NA                                                                                                                                                                                                                                                                                                                                                                                                                                | NA                     | NA                                                                                                                                                                                                                                                                                                                                                                                                                                                                                                                                                                                                                                                                                                                                                                                                                                                                                              |
| 16. | Latvia         | <a href="http://www.cbd.int/kb/record/focalPoint/5785">http://www.cbd.int/kb/record/focalPoint/5785</a> | NA                                                                                                                                                                                                                                                                                                                                                                                                  | NA                                                                                                                                                                                                                                                                                                                                                                                                                                | NA                     | NA                                                                                                                                                                                                                                                                                                                                                                                                                                                                                                                                                                                                                                                                                                                                                                                                                                                                                              |
| 17. | Lithuania      | <a href="http://www.cbd.int/kb/record/focalPoint/4167">http://www.cbd.int/kb/record/focalPoint/4167</a> | NA                                                                                                                                                                                                                                                                                                                                                                                                  | NA                                                                                                                                                                                                                                                                                                                                                                                                                                | NA                     | NA                                                                                                                                                                                                                                                                                                                                                                                                                                                                                                                                                                                                                                                                                                                                                                                                                                                                                              |
| 18. | Luxembourg     | <a href="http://www.cbd.int/kb/record/focalPoint/7090">http://www.cbd.int/kb/record/focalPoint/7090</a> | NA                                                                                                                                                                                                                                                                                                                                                                                                  | NA                                                                                                                                                                                                                                                                                                                                                                                                                                | NA                     | NA                                                                                                                                                                                                                                                                                                                                                                                                                                                                                                                                                                                                                                                                                                                                                                                                                                                                                              |

|     |                        |                                                                                                         |                                                                                                                                                                                                                                                                  |                                                                                                                                                                                                                                                                                                                                                                                                                                                                                                                                                                                      |     |                                                                                                                                                                                                                   |
|-----|------------------------|---------------------------------------------------------------------------------------------------------|------------------------------------------------------------------------------------------------------------------------------------------------------------------------------------------------------------------------------------------------------------------|--------------------------------------------------------------------------------------------------------------------------------------------------------------------------------------------------------------------------------------------------------------------------------------------------------------------------------------------------------------------------------------------------------------------------------------------------------------------------------------------------------------------------------------------------------------------------------------|-----|-------------------------------------------------------------------------------------------------------------------------------------------------------------------------------------------------------------------|
| 19. | Malta                  | <a href="http://www.cbd.int/kb/record/focalPoint/3766">http://www.cbd.int/kb/record/focalPoint/3766</a> | <a href="https://absch.cbd.int/data-base/PRO/ABSCH-PRO-MT-248287">https://absch.cbd.int/data-base/PRO/ABSCH-PRO-MT-248287</a>                                                                                                                                    | <a href="https://absch.cbd.int/api/v2013/documents/076627E8-00C9-4696-2DDD-4FA6077AF1F0/attachments/GRU-005%20PIC%20Application%20-%20AC.docx">https://absch.cbd.int/api/v2013/documents/076627E8-00C9-4696-2DDD-4FA6077AF1F0/attachments/GRU-005%20PIC%20Application%20-%20AC.docx</a> ;<br><a href="https://absch.cbd.int/api/v2013/documents/076627E8-00C9-4696-2DDD-4FA6077AF1F0/attachments/GRU-003%20PIC%20Application%20-%20RD.docx">https://absch.cbd.int/api/v2013/documents/076627E8-00C9-4696-2DDD-4FA6077AF1F0/attachments/GRU-003%20PIC%20Application%20-%20RD.docx</a> | yes | <a href="https://agrifish.gov.mt/en/phd/">https://agrifish.gov.mt/en/phd/</a>                                                                                                                                     |
| 20. | Netherlands            | <a href="http://www.cbd.int/kb/record/focalPoint/6745">http://www.cbd.int/kb/record/focalPoint/6745</a> | NA                                                                                                                                                                                                                                                               | NA                                                                                                                                                                                                                                                                                                                                                                                                                                                                                                                                                                                   | NA  | <a href="http://www.absfocalpoint.nl">http://www.absfocalpoint.nl</a>                                                                                                                                             |
| 21. | Poland                 | <a href="http://www.cbd.int/kb/record/focalPoint/2423">http://www.cbd.int/kb/record/focalPoint/2423</a> | NA                                                                                                                                                                                                                                                               | NA                                                                                                                                                                                                                                                                                                                                                                                                                                                                                                                                                                                   | NA  | NA                                                                                                                                                                                                                |
| 22. | Portugal               | <a href="http://www.cbd.int/kb/record/focalPoint/4871">http://www.cbd.int/kb/record/focalPoint/4871</a> | NA                                                                                                                                                                                                                                                               | NA                                                                                                                                                                                                                                                                                                                                                                                                                                                                                                                                                                                   | NA  | <a href="http://www.icnf.pt/portal/pn/biodiversidade/ei/cbd/prot-nagoia">http://www.icnf.pt/portal/pn/biodiversidade/ei/cbd/prot-nagoia</a>                                                                       |
| 23. | Romania                | <a href="http://www.cbd.int/kb/record/focalPoint/5765">http://www.cbd.int/kb/record/focalPoint/5765</a> | NA                                                                                                                                                                                                                                                               | NA                                                                                                                                                                                                                                                                                                                                                                                                                                                                                                                                                                                   | NA  | NA                                                                                                                                                                                                                |
| 24. | Slovakia               | <a href="http://www.cbd.int/kb/record/focalPoint/6680">http://www.cbd.int/kb/record/focalPoint/6680</a> | NA                                                                                                                                                                                                                                                               | NA                                                                                                                                                                                                                                                                                                                                                                                                                                                                                                                                                                                   | NA  | NA                                                                                                                                                                                                                |
| 25. | Slovenia               | <a href="http://www.cbd.int/kb/record/focalPoint/5880">http://www.cbd.int/kb/record/focalPoint/5880</a> | NA                                                                                                                                                                                                                                                               | NA                                                                                                                                                                                                                                                                                                                                                                                                                                                                                                                                                                                   | NA  | NA                                                                                                                                                                                                                |
| 26. | Spain                  | <a href="http://www.cbd.int/kb/record/focalPoint/5963">http://www.cbd.int/kb/record/focalPoint/5963</a> | NA                                                                                                                                                                                                                                                               | NA                                                                                                                                                                                                                                                                                                                                                                                                                                                                                                                                                                                   | NA  | <a href="https://www.miteco.gob.es/en/biodiversidad/temas/recursos-geneticos/protocolo-de-nagoya/FAQ.aspx">https://www.miteco.gob.es/en/biodiversidad/temas/recursos-geneticos/protocolo-de-nagoya/FAQ.aspx</a>   |
| 27. | Sweden                 | <a href="http://www.cbd.int/kb/record/focalPoint/4187">http://www.cbd.int/kb/record/focalPoint/4187</a> | NA                                                                                                                                                                                                                                                               | NA                                                                                                                                                                                                                                                                                                                                                                                                                                                                                                                                                                                   | NA  | <a href="http://www.swedishepa.se/Guidance/Guidance/Species-Protection/Genetic-resources/">http://www.swedishepa.se/Guidance/Guidance/Species-Protection/Genetic-resources/</a>                                   |
| 28. | Iceland                | NA                                                                                                      | NA                                                                                                                                                                                                                                                               | NA                                                                                                                                                                                                                                                                                                                                                                                                                                                                                                                                                                                   | NA  | NA                                                                                                                                                                                                                |
| 29. | Liechtenstein          | NA                                                                                                      | NA                                                                                                                                                                                                                                                               | NA                                                                                                                                                                                                                                                                                                                                                                                                                                                                                                                                                                                   | NA  | NA                                                                                                                                                                                                                |
| 30. | Norway                 | <a href="http://www.cbd.int/kb/record/focalPoint/7516">http://www.cbd.int/kb/record/focalPoint/7516</a> | NA                                                                                                                                                                                                                                                               | NA                                                                                                                                                                                                                                                                                                                                                                                                                                                                                                                                                                                   | no  | Nagoya-protokollen   Forskningsetikk                                                                                                                                                                              |
| 31. | Switzerland            | <a href="http://www.cbd.int/kb/record/focalPoint/6873">http://www.cbd.int/kb/record/focalPoint/6873</a> | <a href="https://absch.cbd.int/data-base/PRO/ABSCH-PRO-CH-252013">https://absch.cbd.int/data-base/PRO/ABSCH-PRO-CH-252013</a> ;<br><a href="https://absch.cbd.int/data-base/PRO/ABSCH-PRO-CH-252012">https://absch.cbd.int/data-base/PRO/ABSCH-PRO-CH-252012</a> | <a href="https://www.bafu.admin.ch/dam/bafu/fr/dokumente/biotechnologie/formular/formular_fuer_diemeldungeineszugangszugenetischenressourceniminl.docx.download.docx/formulaire_pour_lanot">https://www.bafu.admin.ch/dam/bafu/fr/dokumente/biotechnologie/formular/formular_fuer_diemeldungeineszugangszugenetischenressourceniminl.docx.download.docx/formulaire_pour_lanot</a>                                                                                                                                                                                                    | no  | <a href="https://www.bafu.admin.ch/bafu/en/home/topics/biotechnology/info-specialists/nagoya-protocol.html">https://www.bafu.admin.ch/bafu/en/home/topics/biotechnology/info-specialists/nagoya-protocol.html</a> |
| 32. | Albania                | <a href="http://www.cbd.int/kb/record/focalPoint/5135">http://www.cbd.int/kb/record/focalPoint/5135</a> | NA                                                                                                                                                                                                                                                               | NA                                                                                                                                                                                                                                                                                                                                                                                                                                                                                                                                                                                   | NA  | NA                                                                                                                                                                                                                |
| 33. | Montenegro             | <a href="http://www.cbd.int/kb/record/focalPoint/6312">http://www.cbd.int/kb/record/focalPoint/6312</a> | NA                                                                                                                                                                                                                                                               | NA                                                                                                                                                                                                                                                                                                                                                                                                                                                                                                                                                                                   | NA  | NA                                                                                                                                                                                                                |
| 34. | North Macedonia        | <a href="http://www.cbd.int/kb/record/focalPoint/5663">http://www.cbd.int/kb/record/focalPoint/5663</a> | NA                                                                                                                                                                                                                                                               | NA                                                                                                                                                                                                                                                                                                                                                                                                                                                                                                                                                                                   | NA  | NA                                                                                                                                                                                                                |
| 35. | Serbia                 | <a href="http://www.cbd.int/kb/record/focalPoint/5019">http://www.cbd.int/kb/record/focalPoint/5019</a> | NA                                                                                                                                                                                                                                                               | NA                                                                                                                                                                                                                                                                                                                                                                                                                                                                                                                                                                                   | NA  | NA                                                                                                                                                                                                                |
| 36. | Turkey                 | <a href="http://www.cbd.int/kb/record/focalPoint/7445">http://www.cbd.int/kb/record/focalPoint/7445</a> | NA                                                                                                                                                                                                                                                               | NA                                                                                                                                                                                                                                                                                                                                                                                                                                                                                                                                                                                   | NA  | NA                                                                                                                                                                                                                |
| 37. | Bosnia and Herzegovina | <a href="http://www.cbd.int/kb/record/focalPoint/3523">http://www.cbd.int/kb/record/focalPoint/3523</a> | NA                                                                                                                                                                                                                                                               | NA                                                                                                                                                                                                                                                                                                                                                                                                                                                                                                                                                                                   | NA  | NA                                                                                                                                                                                                                |
